# Supplementary material for: Combinatorial targeting of a chromatin complex comprising Dot1L, menin and the tyrosine kinase BAZ1B reveals a new therapeutic vulnerability of endocrine therapy-resistant breast cancer
Source: Springer Nature journal article supplement (doi:10.1186/s13058-022-01547-7), 2022-07-18

Uncropped blots Fig. 1A

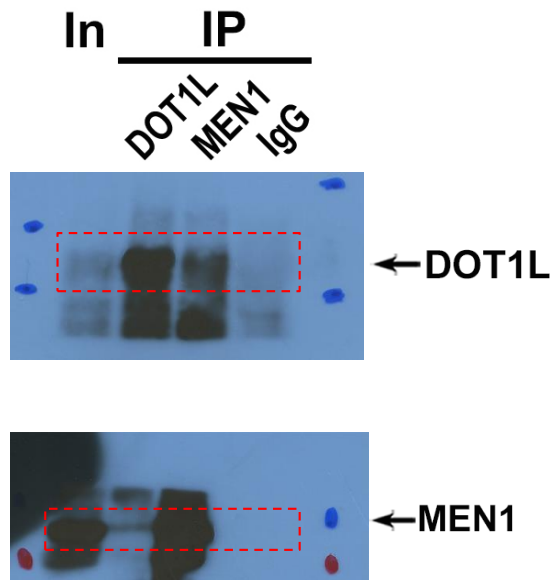

Uncropped blots Fig. 3A

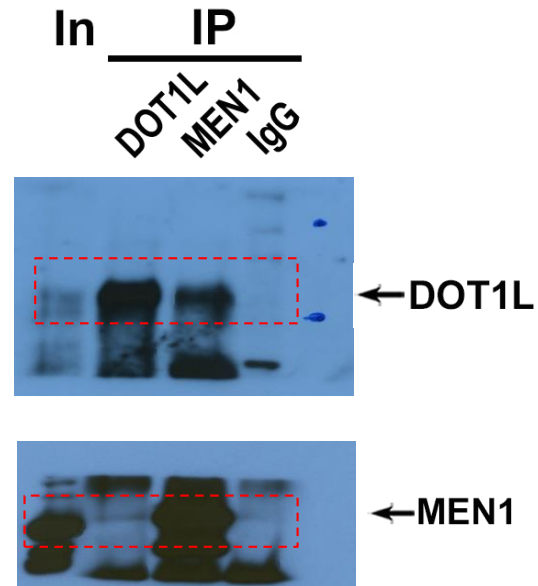

Uncropped blots Fig. 4B

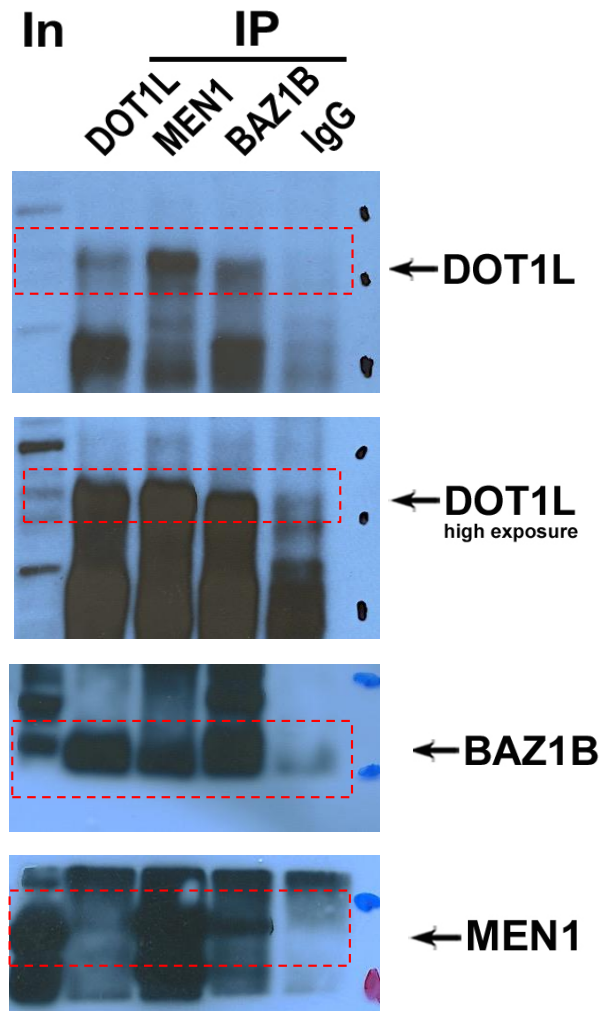

Uncropped blots Fig. 6D

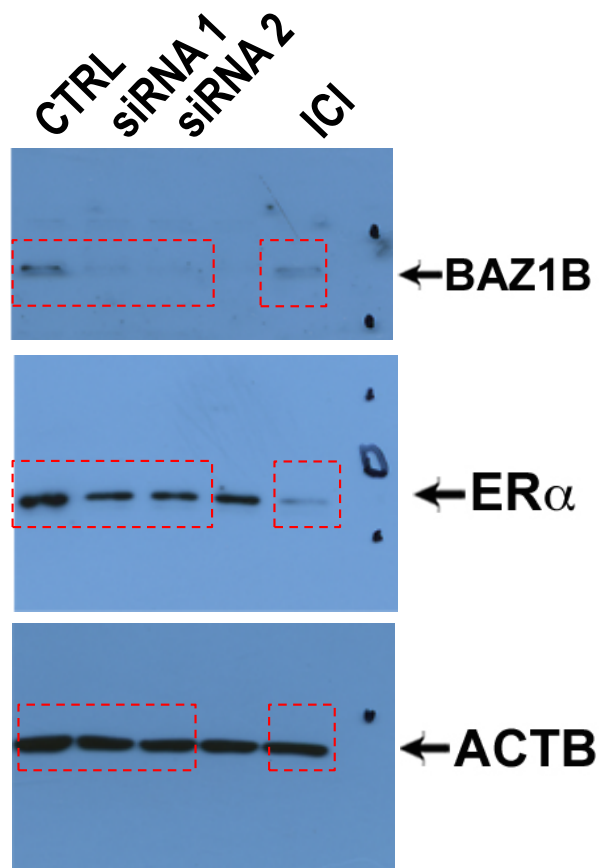

Uncropped blots Fig. 6E

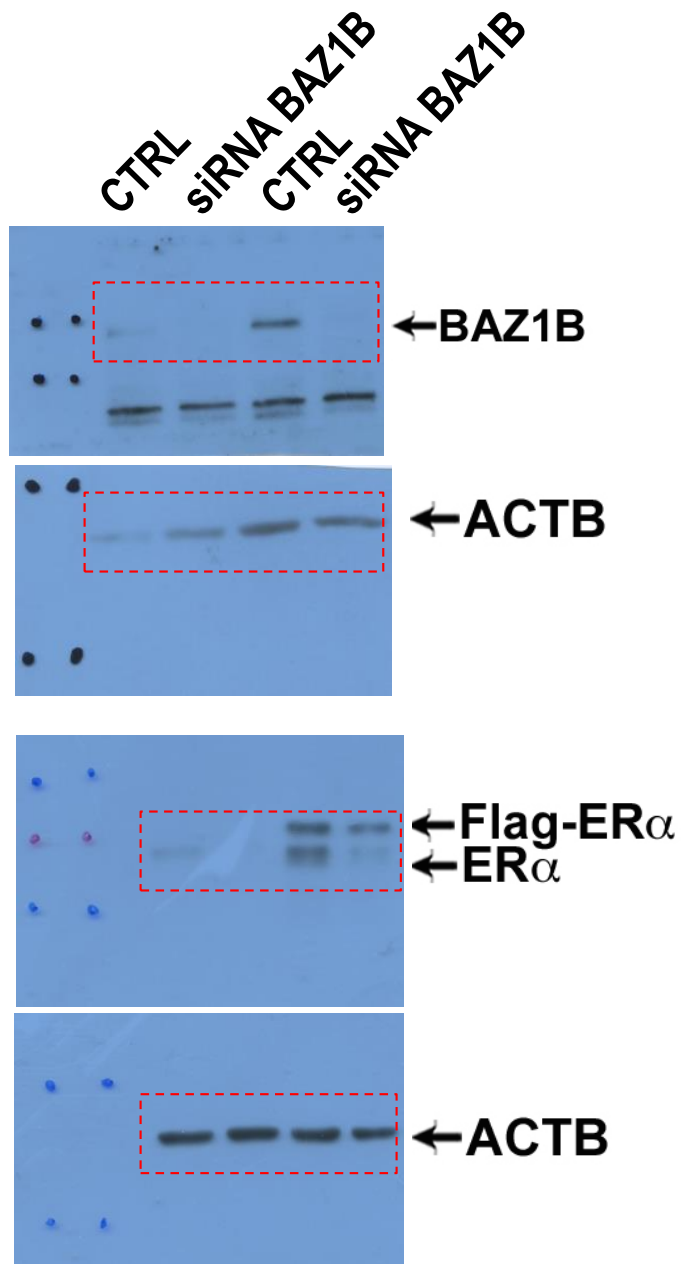

Uncropped blots Fig. 7F

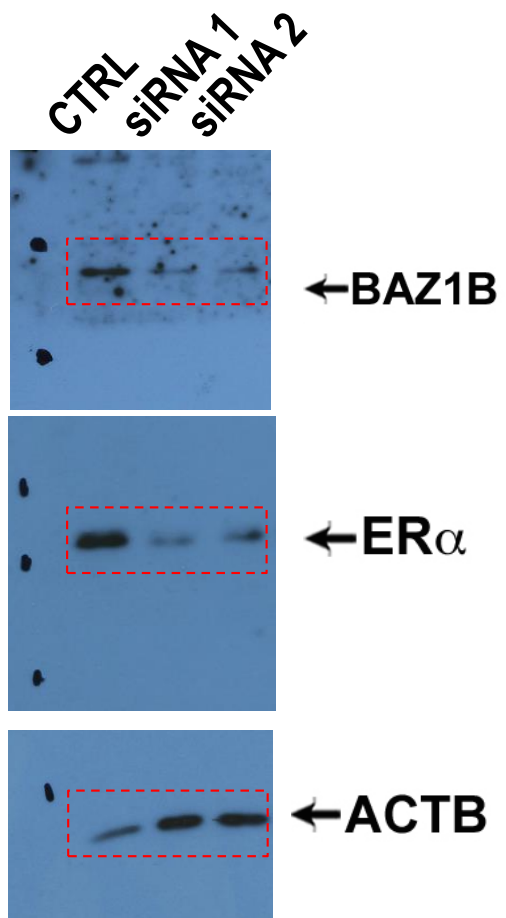

Uncropped blots Fig. 7I

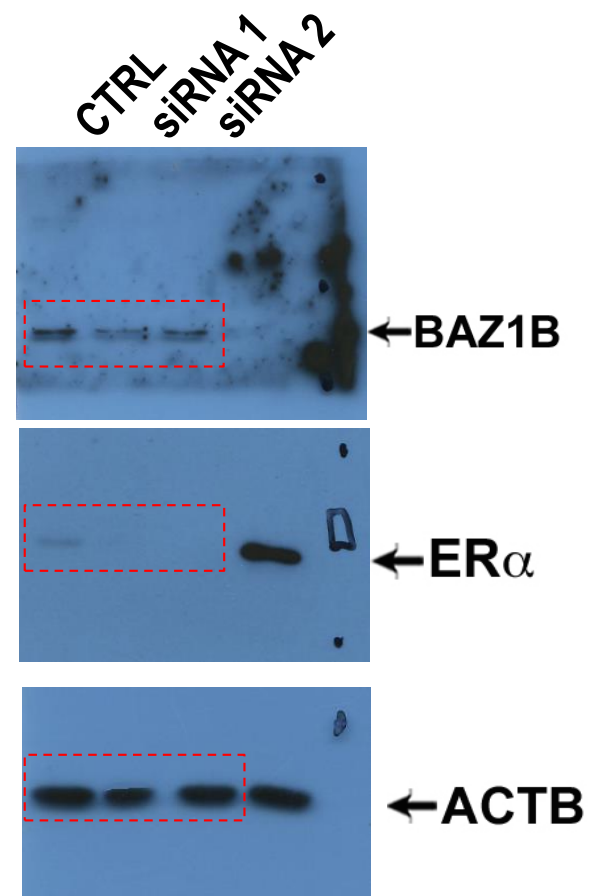

Uncropped blots Fig. S3 (DOT1L)

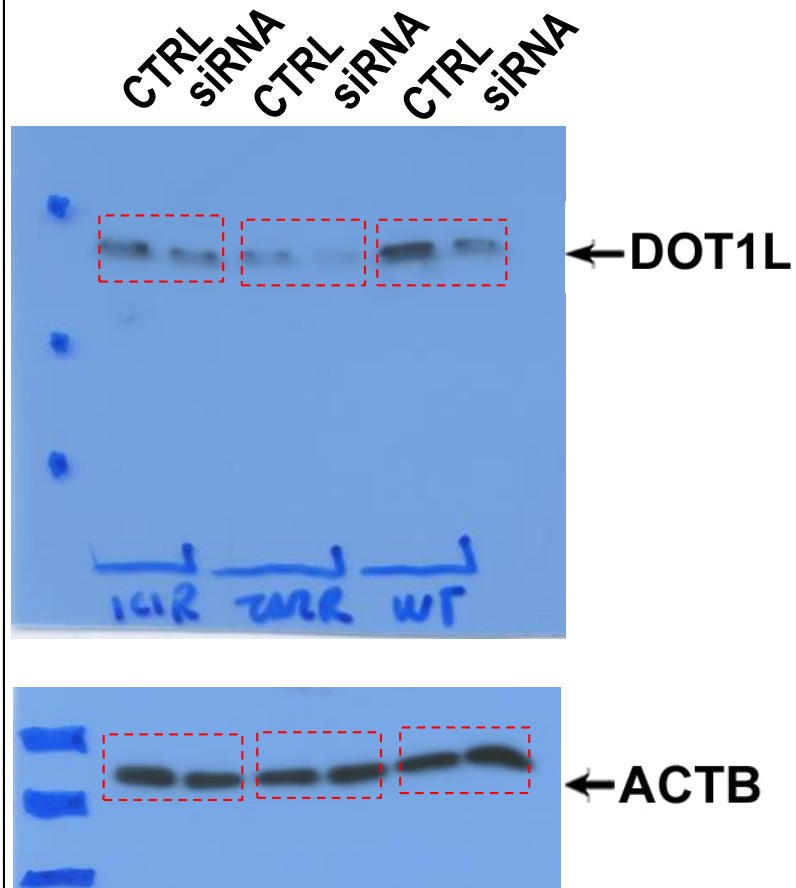

Uncropped blots Fig. S3 (MEN1)

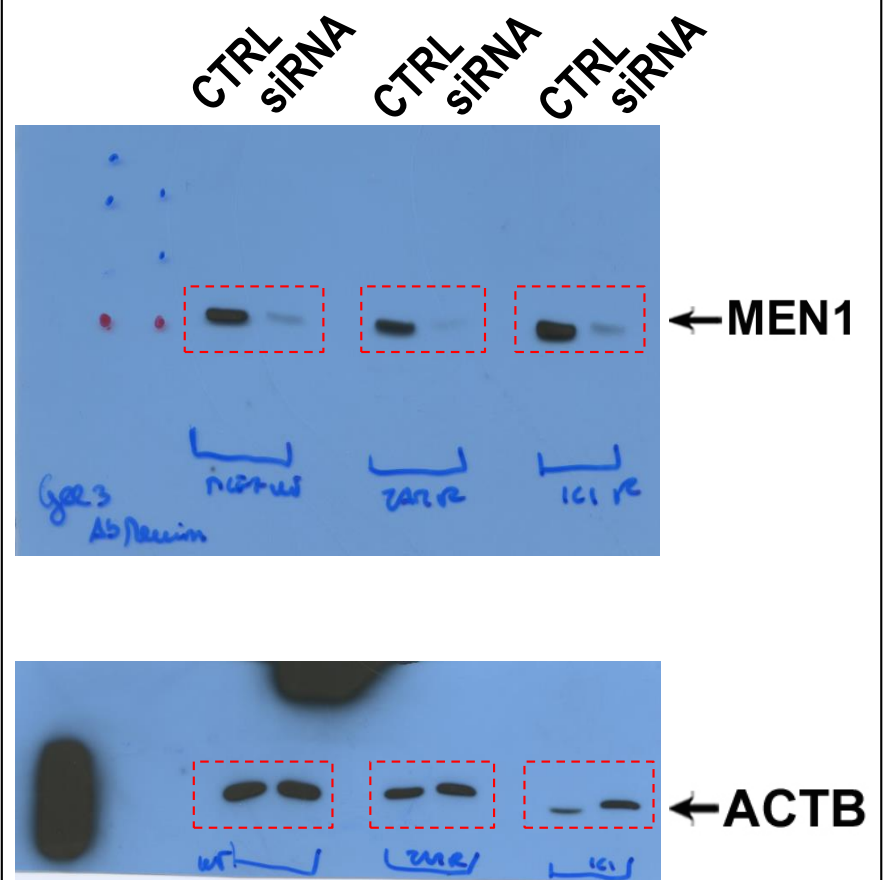

Uncropped blots Fig. S6A-C

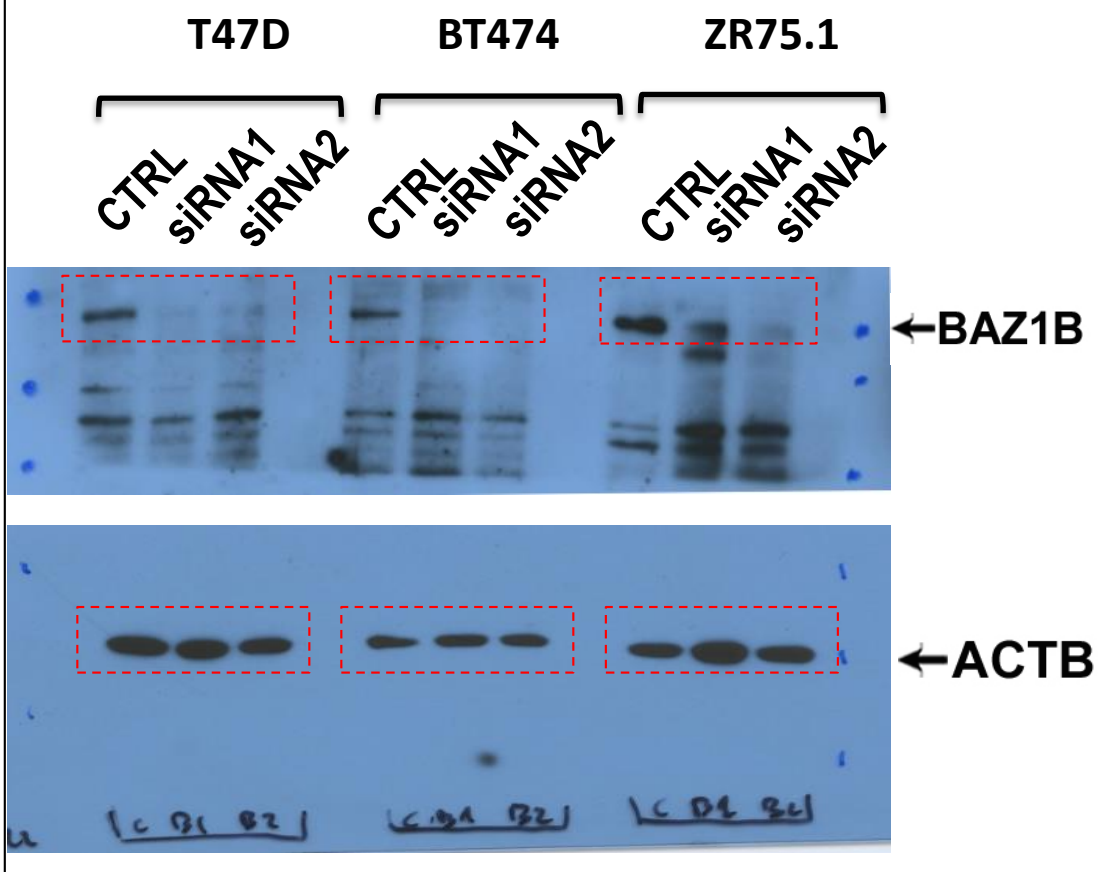

Supplement: MOESM6 [file 23278572]
